# Supplementary material for: Disruption of piRNA machinery by deletion of ASZ1/GASZ results in the expression of aberrant chimeric transcripts in gonocytes
Source: PubMed Central journal article supplement — J Reprod Dev. 2022 Jan 30;68(2):125–36. doi: 10.1262/jrd.2021-146 (PMC8979798; doi:10.1262/jrd.2021-146), 2022-01-30
Supplement: jrd-68-125-s001.pdf [file jrd-68-125-s001.pdf]

## Supplementary information for Materials and Methods

### *Sequencing splicing sites of IAP-derived *Fancd2**

To validate the RNA-seq data and detect the aberrant chimeric transcripts, a part of cDNA synthesized for RNA-seq analysis was subjected to PCR using a primer set and TaKaRa Ex Taq Hot Start Version (#RR006A; Takara). PCR products of IAP-derived *Fancd2* were cloned into a pGEM-T Easy Vector (#1360; Promega, Madison, WI, USA), and plasmids were subjected to DNA sequencing analysis using SP6 and T7 primers. Sequencing of the cloned amplicon was performed using an ABI PRISM 3130 platform (Thermo Fisher Scientific). The sequence was viewed using SnapGene® software (Insightful Science LLC, San Diego, CA, USA; available at [snapgene.com](http://snapgene.com)). The primers used for PCR are shown in Supplementary Table 2.

### *Bisulfite sequencing analysis*

FACS-purified gonocytes from 1 dpp mice and spermatogenic cells of 2-week-old mice were subjected to DNA extraction using the QIAamp DNA Micro Kit (#56304; Qiagen) and subsequent bisulfite treatment with EpiTect Bisulfite Kits (#59104; Qiagen) for DNA methylation analysis. DNA was extracted from three biologically independent cell pools, and PCR products were cloned into the pGEM-T Easy vector. Plasmids were amplified from single colonies using a TempliPhi 500 Amplification Kit (#25640050; Cytiva, Tokyo, Japan) and sequenced using an ABI PRISM 3130 platform (Thermo Fisher Scientific). DNA methylation was analyzed using QUMA [38].

All the primers used for bisulfite sequencing analysis are shown in Supplementary Table 2.

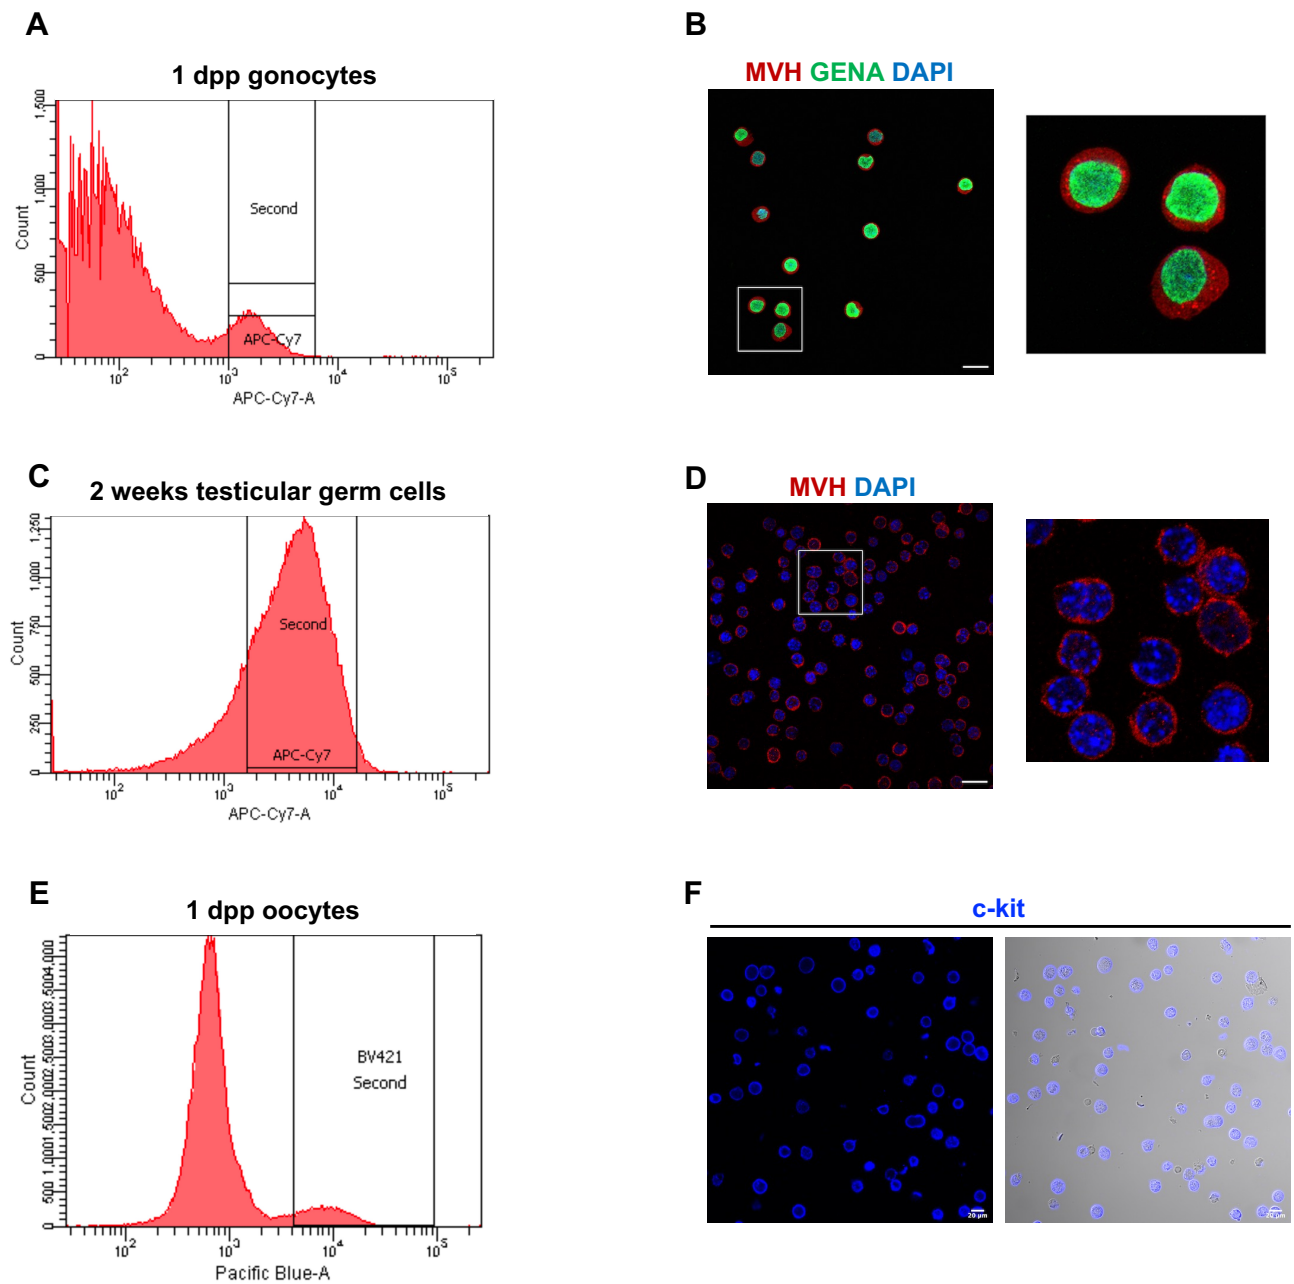

### Supplementary Fig. 1. Purification of germ cells by FACS

(A, C, E) A flow cytometric analysis for gonocytes from 1dpp mice, spermatogenic cells from 2-week-old mice, and non-growing oocytes from 1 dpp mice. An anti-EpCAM antibody labeled with deep-red fluorescence was used for FACS purification of gonocytes and spermatogenic cells. An anti-c-kit antibody labeled with blue fluorescence was used for FACS purification of non-growing oocytes. The horizontal axis indicates the fluorescence intensity of labeled cells. (B) Immunofluorescence analysis of germ cell-specific markers, DDX4/MVH (red) and GENA/TRA98 (green) in gonocytes purified by FACS. Nuclei (blue) were counterstained with DAPI. (D) Immunofluorescence analysis of DDX4/MVH (red) in spermatogenic cells purified by FACS. Nuclei (blue) were counterstained with DAPI. (F) Confocal microscopy images of purified non-growing oocytes by FACS. Scale bars indicate 20  $\mu$ m.

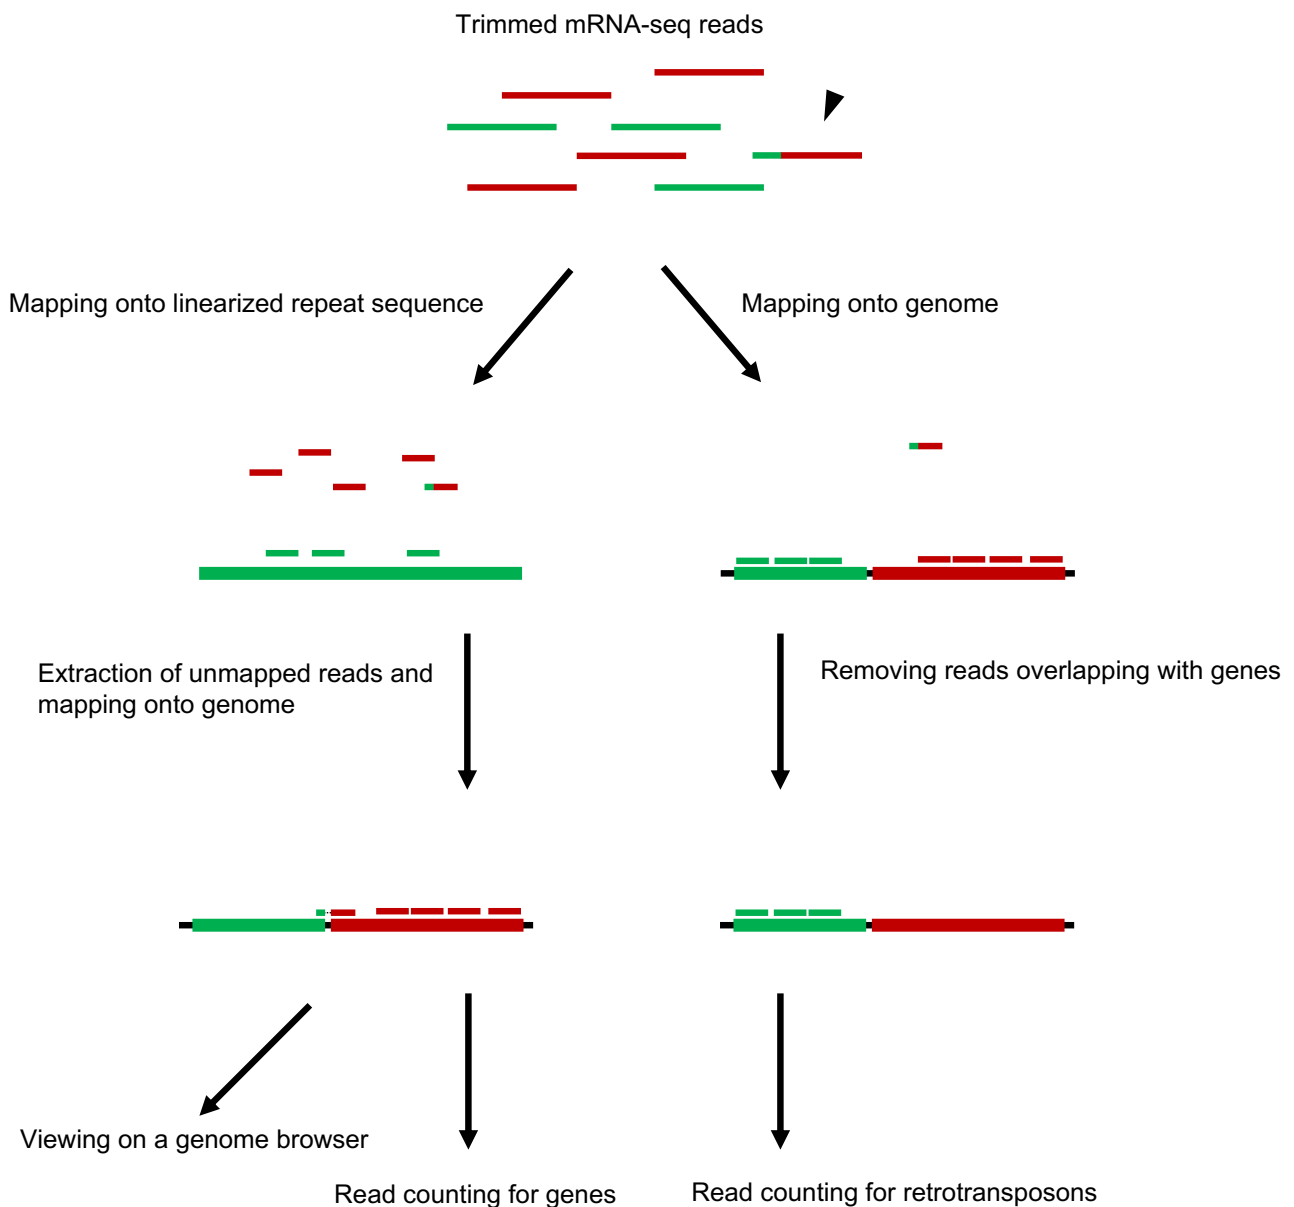

**Supplementary Fig. 2. Schematic representation of read mapping of retrotransposons and other genes**

To count reads separately for retrotransposons and the other genes, trimmed RNA-seq reads were mapped onto the genome using two different strategies. The arrowhead indicates an aberrant chimeric read composed of a part of a retrotransposon (green) and an adjacent gene (red). To assess the expression levels of genes other than retrotransposons, reads were mapped on a linearized repeat sequence, and all reads that were defined as retrotransposon RNA were removed. Thereafter, the remaining reads were mapped onto the genomic sequence and subjected to read counts. Chimeric reads were counted during this process because they were not mapped onto the linearized repeat sequence. On the other hand, to assess expression levels of retrotransposons, RNA-seq reads were mapped onto the genome, excluding splicing junctions. Subsequently, reads overlapping with genes other than retrotransposons were removed. Chimeric reads were excluded from the analysis.

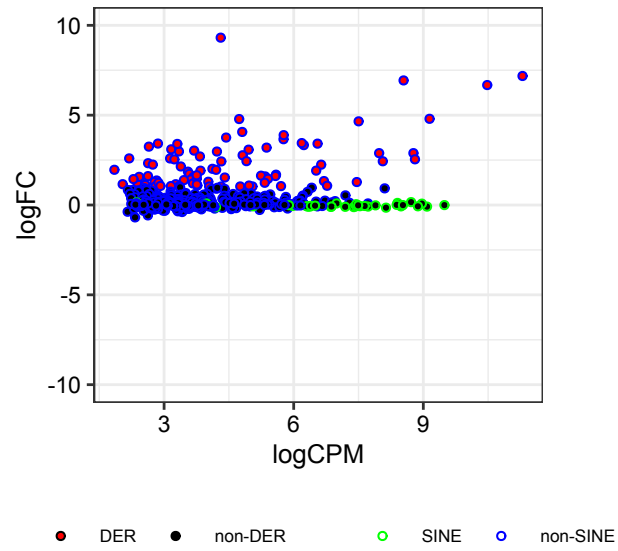

### Supplementary Fig. 3. Expression fold changes of SINE elements

The MA plot represents the same data as that shown in Fig. 4A. Dots with green and blue borders indicate the SINE and non-SINE elements, respectively. Differentially expressed retrotransposons are shown as red dots (FDR < 0.01, |fold-change| > 2).

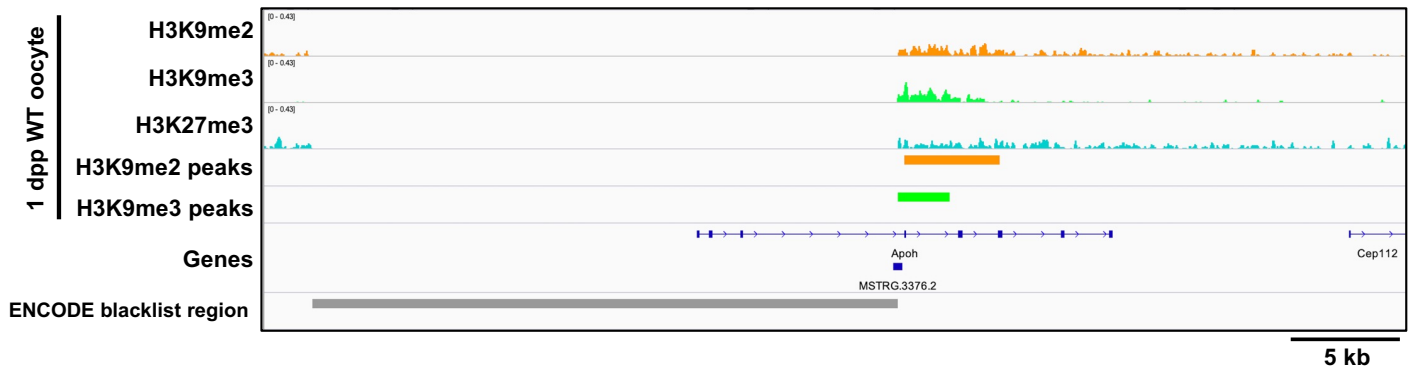

**Supplementary Fig. 4. Enrichment of repressive histone marks in non-growing oocytes in the *Apoh* region**

MSTRG.3376.2 is an aberrant exon of *IAP-Apoh*. Reads on the ENCODE blacklist region were removed and excluded from ChIP-seq analysis because of their low complexity. Details of the analysis are described in the Materials and Methods section. Previously published ChIP-seq datasets (DRA006633) were used.

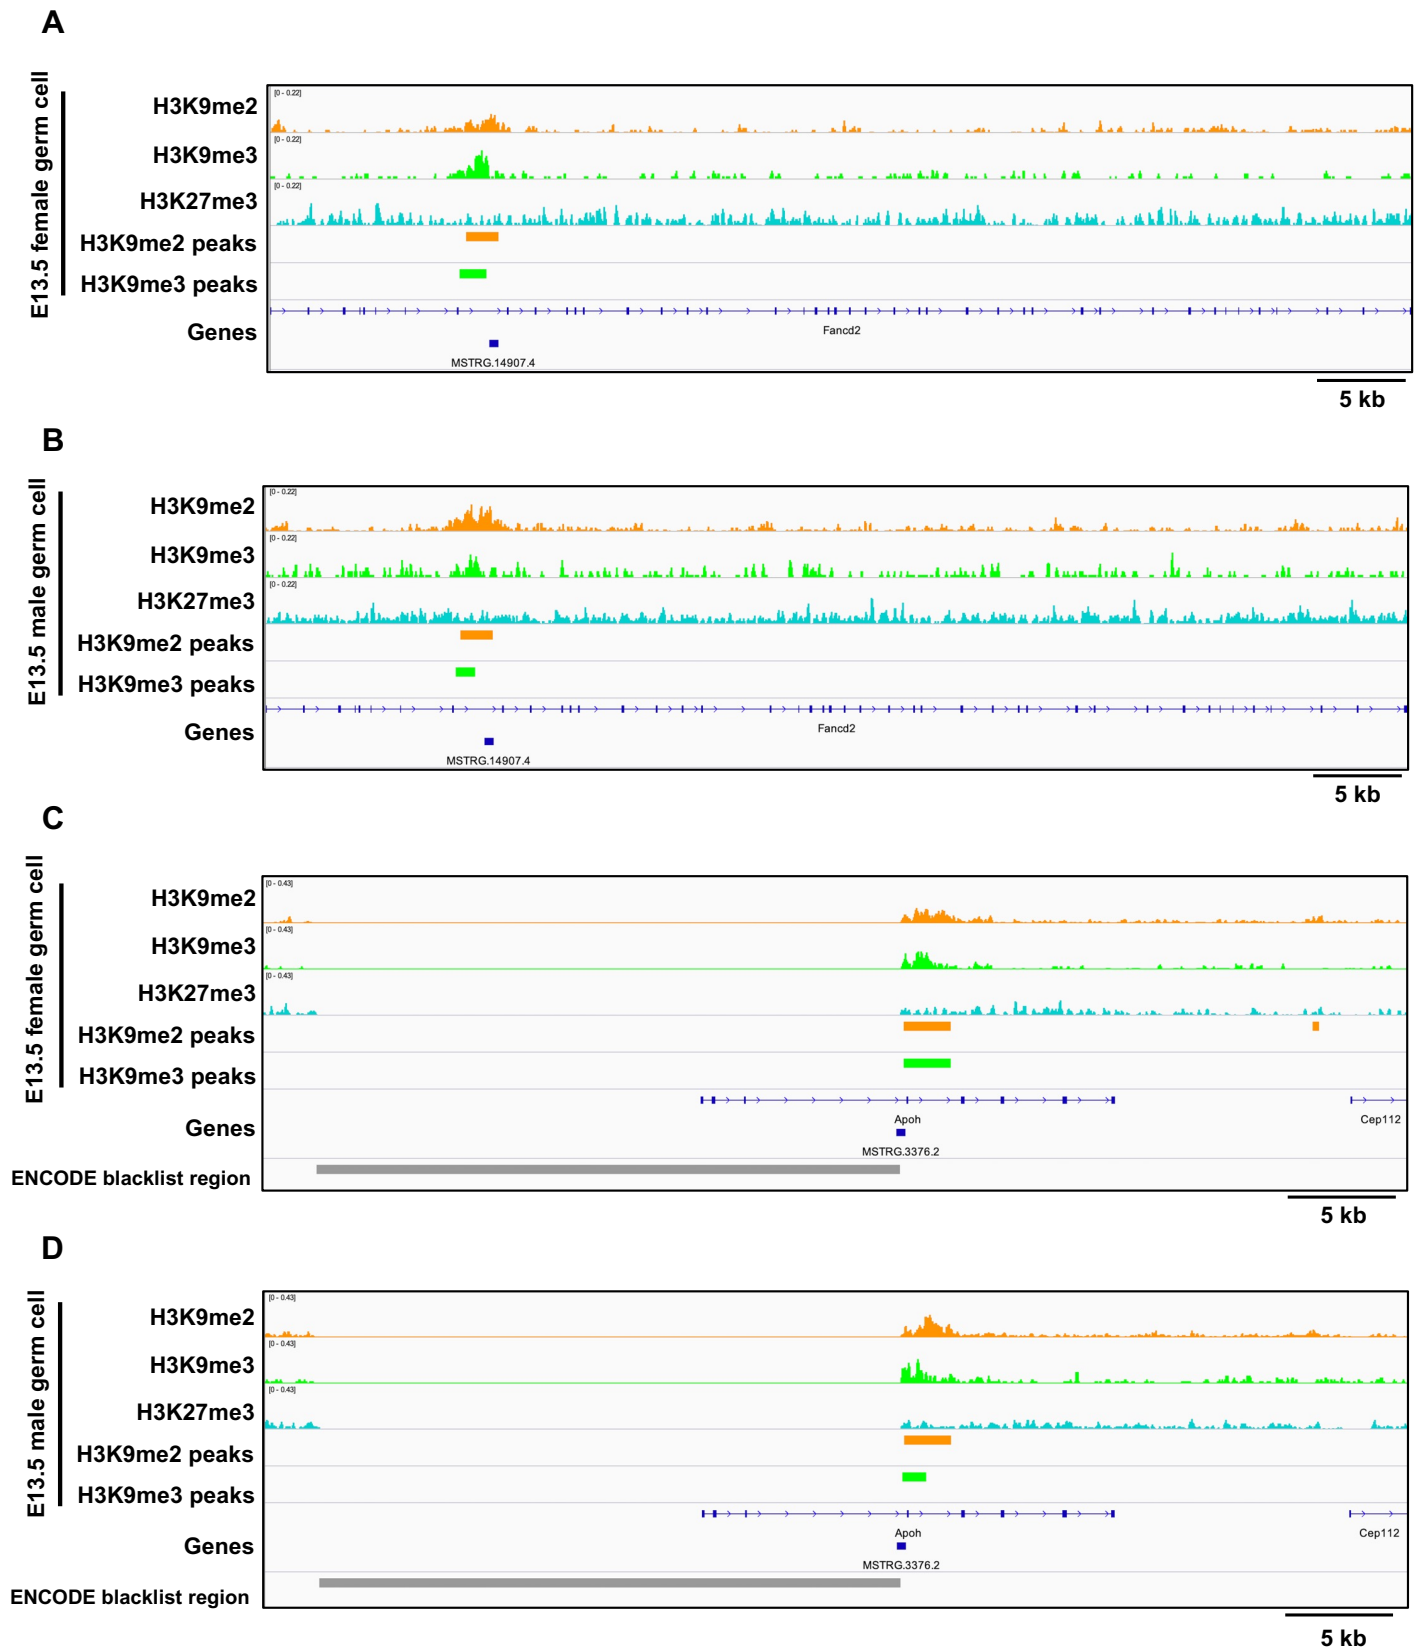

**Supplementary Fig. 5. Enrichment of repressive histone marks in early germline**

(A-B) Enrichment of H3K9me2, H3K9me3, and H3K27me3 in female (A) and male germ cells (B) of E13.5 fetuses in the *Fancd2* region. (C-D) Enrichment of H3K9me2, H3K9me3, and H3K27me3 in female (C) and male germ cells (D) of E13.5 fetuses in the *Apoh* region. Previously published ChIP-seq data sets (DRA006633) were used.

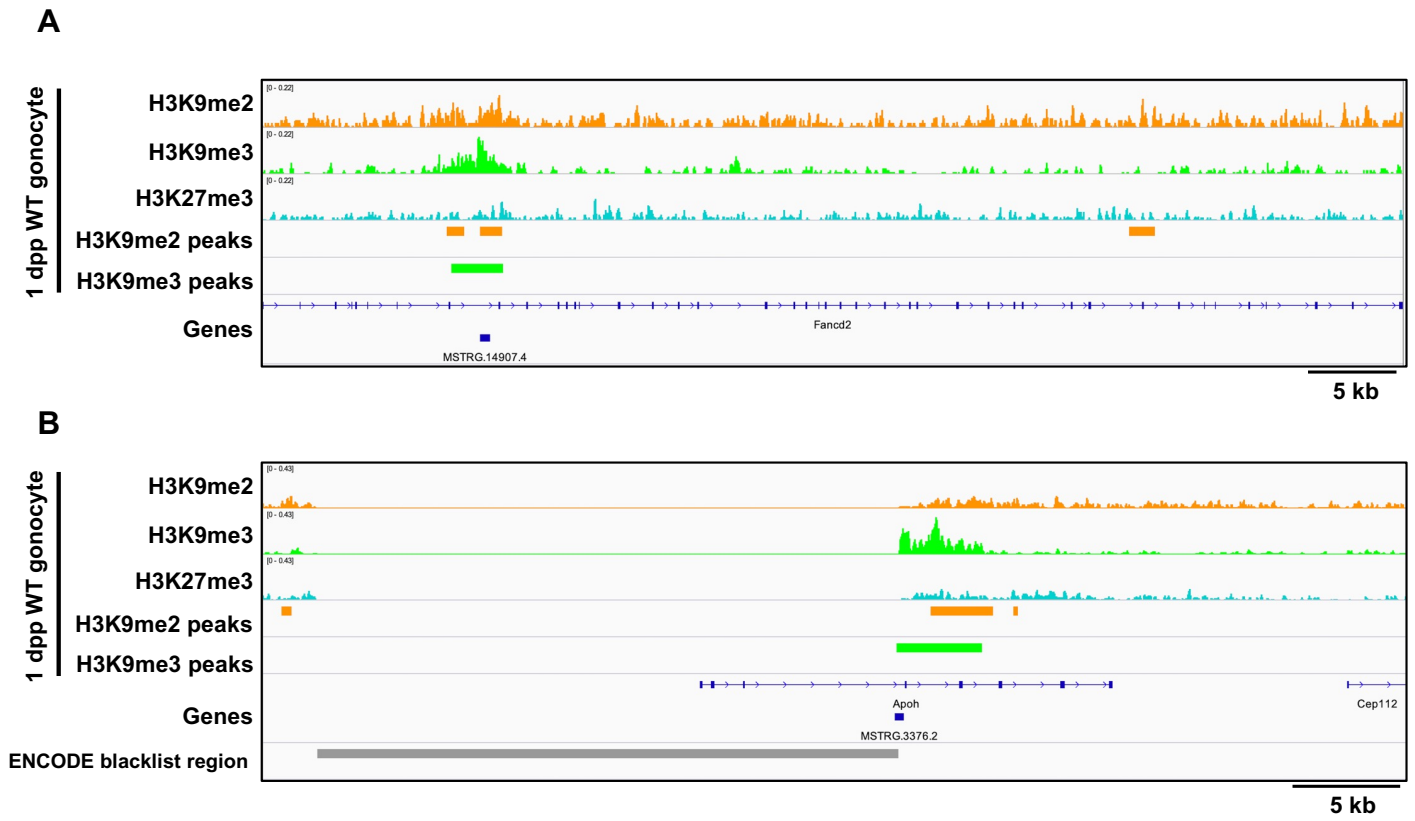

**Supplementary Fig. 6. Enrichment of repressive histone marks in gonocytes**

(A-B) Enrichment of H3K9me2, H3K9me3, and H3K27me3 in the *Fancd2* region (A) and the *Apoh* region (B) in gonocytes of 1 dpp wild-type mice. Previously published ChIP-seq data sets (DRA006633) were used.

Supplementary Table 1. Antibodies used for immunofluorescence, western blotting, and FACS.

| Primary antibodies                          | Supplier                 | Reference   | Species | Type       | Dilution           |                  |       |
|---------------------------------------------|--------------------------|-------------|---------|------------|--------------------|------------------|-------|
|                                             |                          |             |         |            | Immunofluorescence | Western blotting | FACS  |
| ASZ1                                        | GeneTex                  | GTX111618   | rabbit  | polyclonal |                    | 1/1000           |       |
| MVH (DDX4)                                  | abcam                    | ab13840     | rabbit  | polyclonal | 1/500              | 1/1000           |       |
| GENA                                        | BioAcademia              | 73-003      | rat     | monoclonal | 1/500              |                  |       |
| SCP1                                        | abcam                    | ab15090     | rabbit  | polyclonal | 1/500              |                  |       |
| SCP3                                        | abcam                    | ab97672     | mouse   | monoclonal | 1/500              |                  |       |
| PIWIL4 (MIWI2)                              | abcam                    | ab21869     | rabbit  | polyclonal | 1/500              |                  |       |
| L1ORF1p                                     | abcam                    | ab216324    | rabbit  | monoclonal | 1/500              |                  |       |
| CD16/32                                     | BioLegend                | 101301      | rat     | monoclonal |                    |                  | 1/200 |
| EpCAM (APC/Fire750-conjugated)              | BioLegend                | 118229      | rat     | monoclonal |                    |                  | 1/200 |
| e-kit (Brilliant Violet 421-conjugated)     | BioLegend                | 135123      | rat     | monoclonal |                    |                  | 1/200 |
| GAPDH                                       | Trevigen                 | 2275-PC-100 | rabbit  | polyclonal |                    | 1/1000           |       |
| Secondary antibodies                        | Supplier                 | Reference   | Species | Type       | Dilution           |                  |       |
|                                             |                          |             |         |            | Immunofluorescence | Western blotting | FACS  |
| Alexa Fluor 488 Donkey anti-Mouse IgG (H+L) | Thermo Fisher Scientific | A-21202     | mouse   | polyclonal | 1/500              |                  |       |
| Alexa Fluor 594 Goat anti-Rabbit IgG (H+L)  | ThermoFisherScientific   | A-11012     | rabbit  | polyclonal | 1/500              |                  |       |
| Anti-Rabbit IgG, HRP-Linked Whole Ab Donkey | Cytiva                   | NA934V      | rabbit  | polyclonal |                    | 1/10000          |       |
| Anti-Mouse IgG, HRP-Linked Whole Ab Sheep   | Cytiva                   | NA931VS     | mouse   | polyclonal |                    | 1/10000          |       |



Supplementary Table 2. Primers used for bisulfite sequencing, q-RT-PCR, and sequencing of PCR products.

| Name           | sequence (5'- 3')         | Splicing site sequencing | Bisulfite sequencing | qRT-PCR |
|----------------|---------------------------|--------------------------|----------------------|---------|
| Cdh12-F        | ATGTTTGTGGTATATTGTTATTTT  |                          | ✓                    |         |
| Cdh12-R        | AACATTACCTATTCTATTTTCCTAA |                          | ✓                    |         |
| Inadl-F        | GTTATGTTGGTTGTATTGTT      |                          | ✓                    |         |
| Inadl-R        | CTTAAAAACATTCTCCTTC       |                          | ✓                    |         |
| Apoh-F         | AGAGAGAAGTAAGAGAGAGAGAAAA |                          | ✓                    |         |
| Apoh-R         | TACCAAATAAAAAACTAAAAAAC   |                          | ✓                    |         |
| Zip72_F        | GAGAAGTTGTTTTTTTATGTG     |                          | ✓                    |         |
| Zip72_R        | TTAAAAATTTTCTACCTCCC      |                          | ✓                    |         |
| Fancd2-F       | GAATTTTAGAAATATAAGGAATG   |                          | ✓                    |         |
| Fancd2-R       | CAAACAATACCTCAAATAAAC     |                          | ✓                    |         |
| Spag16-F       | TTTAGGGAGGATATTAGGAGA     |                          | ✓                    |         |
| Spag16-R       | CAAACAACAAATACCAAAAA      |                          | ✓                    |         |
| Sult2a5-F      | ATTAGGTTGGGTAGTTTGTTTT    |                          | ✓                    |         |
| Sult2a5-R      | TATAAATCTAAAATACTTCTT     |                          | ✓                    |         |
| Fam135a-F      | GTTGTGTGTATAAGGTTTTGTT    |                          | ✓                    |         |
| Fam135a-R      | ATATTCATTCTTTTCTCCC       |                          | ✓                    |         |
| Sec11a-F       | ATAGTTGTGTTTAAAGTGGT      |                          | ✓                    |         |
| Sec11a-R       | CAATCTAAAATCTAATTATT      |                          | ✓                    |         |
| Hibch-F        | ATTTTGTGGTAAGGAAGTT       |                          | ✓                    |         |
| Hibch-R        | AAAATATCTACAAAATAAAC      |                          | ✓                    |         |
| IAP-Fancd2_1_F | CATCTTGCAACGGCGAATGA      | ✓                        |                      | ✓       |
| IAP-Fancd2_1_R | GTTGGGTCAAGTCGGAGAC       | ✓                        |                      | ✓       |
| SP6            | ATTTAGGTGACACTATAGAA      | ✓                        |                      |         |
| T7             | TAATACGACTACTATAGGG       | ✓                        |                      |         |

**Supplementary Table 3. Significantly up- and down-regulated genes in *Asz1*<sup>-/-</sup> mice gonocytes compared with those of wild-type mice.**

| Upregulated Genes in <i>Asz1</i> <sup>-/-</sup> gonocytes |            |            |           |           | Downregulated Genes in <i>Asz1</i> <sup>-/-</sup> gonocytes |            |            |          |          |
|-----------------------------------------------------------|------------|------------|-----------|-----------|-------------------------------------------------------------|------------|------------|----------|----------|
| gene_id                                                   | logFC      | logCPM     | PValue    | FDR       | gene_id                                                     | logFC      | logCPM     | PValue   | FDR      |
| Apoh                                                      | 6.87894841 | 5.22198548 | 1.51E-176 | 3.77E-173 | Asz1                                                        | -7.5110766 | 6.66971389 | 0        | 0        |
| Cdh12                                                     | 8.45543075 | 4.08760179 | 1.02E-105 | 1.27E-102 | Lmna                                                        | -1.826733  | 7.86647621 | 9.20E-62 | 5.73E-59 |
| 4930558C23l                                               | 6.39170013 | 4.1705752  | 1.78E-85  | 1.71E-82  | Inha                                                        | -2.8536438 | 4.46970522 | 1.95E-45 | 6.75E-43 |
| Cbx5                                                      | 2.01856378 | 7.81599404 | 4.31E-66  | 2.99E-63  | Adgrg1                                                      | -1.6000895 | 6.27491838 | 9.02E-37 | 2.34E-34 |
| Tfcp2l1                                                   | 2.73997758 | 5.73106356 | 6.72E-62  | 4.41E-59  | Magea8                                                      | -1.7637567 | 5.93105652 | 4.93E-34 | 1.25E-31 |
| Gm16897                                                   | 4.9700051  | 3.69141476 | 4.21E-56  | 2.28E-53  | Chic2                                                       | -1.1835006 | 7.52496583 | 2.05E-30 | 4.40E-28 |
| Gm9733                                                    | 10.7830501 | 2.7052466  | 4.50E-53  | 2.25E-50  | Ehmt2                                                       | -1.2688152 | 7.92610669 | 4.92E-28 | 9.57E-26 |
| AW551984                                                  | 3.3243023  | 4.4763667  | 3.12E-52  | 1.44E-49  | Axl                                                         | -1.552368  | 5.51048035 | 2.27E-24 | 3.72E-22 |
| Gylt1b                                                    | 1.85338787 | 6.90663231 | 6.19E-52  | 2.66E-49  | Ecm1                                                        | -1.1773188 | 6.64619325 | 3.07E-23 | 4.84E-21 |
| Ms4a6d                                                    | 5.70268118 | 3.50123867 | 1.21E-50  | 5.01E-48  | Magea5                                                      | -1.5023911 | 5.14348738 | 5.05E-22 | 7.32E-20 |
| Cd93                                                      | 2.3289957  | 5.94660073 | 1.90E-50  | 7.63E-48  | Cftr                                                        | -3.7638401 | 3.58175943 | 4.55E-20 | 6.03E-18 |
| Spag16                                                    | 3.1546635  | 4.24822131 | 1.42E-47  | 5.20E-45  | Sdc3                                                        | -1.1949642 | 6.66564719 | 1.26E-19 | 1.56E-17 |
| Fancd2                                                    | 1.48146623 | 7.42639077 | 2.11E-47  | 7.51E-45  | Gstm2                                                       | -2.0149187 | 4.03823729 | 1.51E-18 | 1.71E-16 |
| Mup3                                                      | 6.28045094 | 2.88925469 | 3.57E-45  | 1.20E-42  | Gpd2                                                        | -1.3333776 | 5.18321231 | 1.73E-18 | 1.94E-16 |
| Polr1a                                                    | 1.42176268 | 7.13048199 | 4.48E-44  | 1.47E-41  | Sult5a1                                                     | -1.1832245 | 5.80440994 | 2.31E-17 | 2.30E-15 |
| Clec2g                                                    | 6.61337356 | 2.66345346 | 8.55E-43  | 2.73E-40  | Cst9                                                        | -3.8047878 | 1.62094378 | 8.78E-17 | 8.42E-15 |
| Sult2a5                                                   | 7.51757615 | 2.64630744 | 1.46E-39  | 4.44E-37  | Prss35                                                      | -2.7430257 | 2.35108919 | 2.99E-16 | 2.74E-14 |
| Abcb11                                                    | 4.25839768 | 3.85361299 | 5.14E-39  | 1.53E-36  | Garnl3                                                      | -1.0741896 | 5.99717312 | 8.06E-16 | 7.33E-14 |
| Tmppe                                                     | 1.65913114 | 5.90181699 | 2.10E-37  | 5.69E-35  | Dscaml1                                                     | -1.2393136 | 5.25063927 | 3.09E-14 | 2.45E-12 |
| Bcl6b                                                     | 1.74233201 | 7.94634637 | 2.41E-37  | 6.38E-35  | Hsd17b1                                                     | -2.7592124 | 1.76980478 | 3.24E-14 | 2.54E-12 |
| Cd82                                                      | 1.39170539 | 6.90581052 | 1.13E-33  | 2.81E-31  | Haus7                                                       | -1.1783757 | 5.01045044 | 3.28E-14 | 2.56E-12 |
| Sez6                                                      | 1.34276098 | 7.59284084 | 1.20E-33  | 2.92E-31  | Magea3                                                      | -1.9723907 | 3.16269202 | 7.00E-14 | 5.22E-12 |
| AA792892                                                  | 10.1027647 | 2.04707938 | 3.12E-32  | 7.33E-30  | Gm773                                                       | -1.0519945 | 5.81735223 | 1.13E-13 | 8.21E-12 |
| Itga7                                                     | 1.50786181 | 6.19604428 | 5.79E-31  | 1.30E-28  | Prdx2                                                       | -1.0772495 | 5.35289998 | 1.54E-13 | 1.09E-11 |
| Samd9l                                                    | 3.82819352 | 3.12564986 | 5.86E-31  | 1.30E-28  | Lama4                                                       | -1.3671772 | 4.61840606 | 3.03E-13 | 2.08E-11 |
| Gm6329                                                    | 2.41754246 | 4.21605564 | 5.93E-31  | 1.30E-28  | Hcfc2                                                       | -1.0459514 | 5.36381702 | 3.65E-13 | 2.48E-11 |
| Cntn6                                                     | 2.30880626 | 4.33300407 | 4.84E-29  | 1.02E-26  | Arap3                                                       | -1.3862196 | 4.15351421 | 6.48E-13 | 4.29E-11 |
| Tmem232                                                   | 1.72711291 | 5.21841503 | 5.10E-29  | 1.06E-26  | Bcar3                                                       | -1.1549737 | 4.79512658 | 1.64E-12 | 1.01E-10 |
| Adtrp                                                     | 2.25226292 | 4.15589707 | 2.28E-28  | 4.59E-26  | Cdkn1a                                                      | -1.1571868 | 4.68987396 | 3.72E-12 | 2.19E-10 |
| Sidtl                                                     | 2.15611241 | 4.46114776 | 3.39E-28  | 6.70E-26  | Jam2                                                        | -2.2632423 | 2.27776063 | 3.81E-12 | 2.22E-10 |
| BC051019                                                  | 3.42375303 | 2.8626333  | 4.28E-27  | 7.97E-25  | Bhlhe40                                                     | -1.0597659 | 5.36340849 | 7.17E-12 | 3.99E-10 |
| Wbp2nl                                                    | 2.65883403 | 3.39538363 | 9.65E-25  | 1.64E-22  | Luzp4                                                       | -1.0124592 | 5.23789617 | 8.51E-12 | 4.67E-10 |
| Gabbr1                                                    | 2.56493201 | 3.75288696 | 9.76E-25  | 1.64E-22  | Tmem184a                                                    | -1.3209092 | 4.18180843 | 9.12E-12 | 4.99E-10 |
| Cdc14b                                                    | 1.17645942 | 6.40364149 | 2.45E-24  | 3.97E-22  | Fbln1                                                       | -1.1804648 | 6.16772588 | 9.29E-12 | 5.05E-10 |
| Cks2                                                      | 1.05743725 | 6.71963356 | 1.82E-22  | 2.80E-20  | Gm1140                                                      | -1.7220909 | 3.67307546 | 1.01E-11 | 5.47E-10 |
| E330020D12                                                | 3.93921365 | 2.01795216 | 2.01E-22  | 3.05E-20  | Pet2                                                        | -1.7133234 | 4.34996034 | 1.02E-11 | 5.50E-10 |
| Atp13a4                                                   | 4.03866909 | 1.82410565 | 2.79E-22  | 4.18E-20  | Amh                                                         | -2.572667  | 2.33444398 | 1.12E-11 | 5.96E-10 |
| Zfp72                                                     | 2.94513306 | 2.85362196 | 3.04E-22  | 4.52E-20  | Msln1                                                       | -2.1718847 | 2.85102531 | 2.10E-11 | 1.07E-09 |
| Ryr1                                                      | 1.27748351 | 6.17725606 | 5.00E-22  | 7.32E-20  | Wnt3                                                        | -1.0374744 | 5.00873306 | 2.25E-11 | 1.14E-09 |
| Inadl                                                     | 1.33536647 | 6.06725635 | 2.72E-21  | 3.85E-19  | Magea2                                                      | -1.6534338 | 3.73037101 | 2.79E-11 | 1.40E-09 |
| Six1                                                      | 1.80908531 | 4.39513511 | 4.04E-21  | 5.66E-19  | Etfb                                                        | -1.1660373 | 4.63297257 | 2.88E-11 | 1.44E-09 |
| Gm14296                                                   | 2.29053542 | 3.59412416 | 7.21E-21  | 9.98E-19  | Aldh1a1                                                     | -2.5752663 | 3.35415147 | 3.28E-11 | 1.62E-09 |
| Gm6182                                                    | 2.29053524 | 3.59412416 | 7.29E-21  | 9.98E-19  | Gatm                                                        | -1.2727435 | 4.40545807 | 4.36E-11 | 2.03E-09 |
| Cdk4                                                      | 2.64050623 | 3.23831732 | 2.30E-20  | 3.11E-18  | Magea1                                                      | -1.7714343 | 2.98043111 | 5.15E-11 | 2.39E-09 |
| Zfp53                                                     | 1.54275423 | 4.94990945 | 2.58E-20  | 3.46E-18  | Akr1cl                                                      | -2.1827875 | 2.40270809 | 5.85E-11 | 2.67E-09 |
| Ripk3                                                     | 1.28911932 | 6.16374427 | 5.44E-20  | 7.06E-18  | S100a6                                                      | -1.2350553 | 4.624746   | 6.26E-11 | 2.83E-09 |
| Dpp4                                                      | 3.30216479 | 3.13973605 | 1.07E-19  | 1.35E-17  | Gja1                                                        | -2.0860624 | 3.37013305 | 6.97E-11 | 3.11E-09 |
| Tmc2                                                      | 3.31077496 | 2.58122805 | 1.27E-19  | 1.56E-17  | Egr3                                                        | -1.5217279 | 3.78805741 | 8.42E-11 | 3.72E-09 |
| Pdk1                                                      | 1.25053942 | 7.20982995 | 1.88E-19  | 2.30E-17  | Gm14692                                                     | -1.6971271 | 3.3070011  | 9.76E-11 | 4.25E-09 |
| 4930481A15l                                               | 2.99916371 | 2.28604451 | 4.71E-19  | 5.54E-17  | Hnrnp3                                                      | -1.1584263 | 4.40137516 | 1.10E-10 | 4.73E-09 |
| Hmmr                                                      | 1.63276152 | 4.74034748 | 1.81E-18  | 2.01E-16  | 1700029J07F                                                 | -1.6425175 | 3.22122933 | 1.51E-10 | 6.26E-09 |
| Ccdc127                                                   | 1.0700891  | 6.73681635 | 1.97E-18  | 2.18E-16  | Kctd14                                                      | -2.2385584 | 2.37945549 | 2.14E-10 | 8.67E-09 |
| Slc35e1                                                   | 1.18806173 | 5.60984361 | 2.88E-18  | 3.15E-16  | Erdr1                                                       | -2.6019867 | 2.00242368 | 2.67E-10 | 1.06E-08 |
| Eva1b                                                     | 1.22832145 | 5.47023281 | 3.42E-18  | 3.71E-16  | Def8                                                        | -1.3215387 | 3.98152964 | 2.90E-10 | 1.14E-08 |
| Gabpb2                                                    | 1.35598388 | 5.56472554 | 4.78E-18  | 5.05E-16  | Nxt2                                                        | -1.7058054 | 2.8243848  | 3.60E-10 | 1.39E-08 |
| Lpp                                                       | 1.09982804 | 6.16916465 | 7.88E-18  | 8.19E-16  | Igdcc4                                                      | -1.1025601 | 4.39277267 | 6.16E-10 | 2.26E-08 |
| Mkl2                                                      | 1.10894313 | 5.75023815 | 3.19E-17  | 3.13E-15  | Rhox13                                                      | -1.038716  | 4.73355472 | 6.45E-10 | 2.36E-08 |
| Plekho2                                                   | 1.13671905 | 5.99051292 | 1.70E-16  | 1.61E-14  | Spag                                                        | -1.4237871 | 3.4288845  | 9.33E-10 | 3.34E-08 |
| Gm14326                                                   | 2.10547661 | 3.83090855 | 2.68E-16  | 2.48E-14  | Rara                                                        | -1.0197345 | 4.65931894 | 9.85E-10 | 3.50E-08 |
| Naip5                                                     | 2.56597883 | 2.45786799 | 1.12E-15  | 1.01E-13  | Pnma5                                                       | -1.3110947 | 3.89796761 | 1.18E-09 | 4.17E-08 |
| Eps8l1                                                    | 2.2250619  | 3.02672439 | 1.45E-15  | 1.30E-13  | Adgrg6                                                      | -1.3923938 | 3.96738421 | 1.29E-09 | 4.51E-08 |
| D17H6S56E-                                                | 1.30501698 | 4.7995196  | 1.83E-15  | 1.63E-13  | Sbsn                                                        | -1.885348  | 2.80227121 | 1.76E-09 | 5.99E-08 |

**Supplementary Table 3. Significantly up- and down-regulated genes in *Asz1*<sup>-/-</sup> mice gonocytes compared with those of wild-type mice.**

| Upregulated Genes in <i>Asz1</i> <sup>-/-</sup> gonocytes |            |            |          |          | Downregulated Genes in <i>Asz1</i> <sup>-/-</sup> gonocytes |            |            |          |          |
|-----------------------------------------------------------|------------|------------|----------|----------|-------------------------------------------------------------|------------|------------|----------|----------|
| Rnf125                                                    | 1.94668788 | 3.91148628 | 1.88E-15 | 1.66E-13 | Gngt2                                                       | -1.3027328 | 4.06323105 | 2.04E-09 | 6.76E-08 |
| Scn7a                                                     | 2.10181038 | 4.42561529 | 4.74E-15 | 4.11E-13 | Scd1                                                        | -1.3895235 | 3.77491635 | 2.41E-09 | 7.93E-08 |
| Zfp882                                                    | 2.16291833 | 3.21587827 | 8.39E-15 | 7.21E-13 | Cntnap4                                                     | -1.5888844 | 2.93260369 | 2.69E-09 | 8.76E-08 |
| Flt4                                                      | 1.64752069 | 4.20891109 | 1.01E-14 | 8.60E-13 | Myh8                                                        | -1.3996892 | 3.89246926 | 2.76E-09 | 8.95E-08 |
| Atp9b                                                     | 1.18021958 | 5.94564414 | 1.27E-14 | 1.05E-12 | Gm15097                                                     | -1.1187958 | 4.30348093 | 3.19E-09 | 1.02E-07 |
| Cyp20a1                                                   | 1.79609779 | 4.17930537 | 1.45E-14 | 1.19E-12 | Rufy2                                                       | -1.0924326 | 4.33504197 | 4.07E-09 | 1.28E-07 |
| Tek                                                       | 1.22929768 | 5.03546653 | 2.04E-14 | 1.63E-12 | Postn                                                       | -1.5448673 | 3.22129854 | 4.11E-09 | 1.29E-07 |
| Alx4                                                      | 2.03990891 | 3.24707637 | 3.15E-14 | 2.48E-12 | Aard                                                        | -1.5629994 | 2.91287879 | 4.13E-09 | 1.29E-07 |
| Colec12                                                   | 1.09431513 | 5.36905239 | 4.27E-14 | 3.29E-12 | Trim47                                                      | -1.3980493 | 3.57089776 | 4.43E-09 | 1.37E-07 |
| Mfap3                                                     | 1.23570125 | 6.36057488 | 4.83E-14 | 3.67E-12 | Thbs2                                                       | -1.01839   | 4.50803439 | 5.39E-09 | 1.64E-07 |
| Aig1                                                      | 1.1745335  | 5.61202738 | 6.89E-14 | 5.17E-12 | Lgals7                                                      | -1.168275  | 4.3791012  | 5.51E-09 | 1.67E-07 |
| Nrros                                                     | 1.31503776 | 4.54287487 | 9.52E-14 | 7.02E-12 | Hspb7                                                       | -1.4294413 | 3.32614399 | 6.57E-09 | 1.96E-07 |
| Slc24a2                                                   | 1.6516704  | 4.10551553 | 9.79E-14 | 7.18E-12 | Tep1                                                        | -1.1070292 | 4.11119242 | 1.02E-08 | 2.92E-07 |
| Sorcs2                                                    | 1.9070006  | 3.16577707 | 2.29E-13 | 1.61E-11 | Lad1                                                        | -1.00375   | 4.97890839 | 1.21E-08 | 3.44E-07 |
| Thbd                                                      | 2.70987264 | 2.86225461 | 5.22E-13 | 3.51E-11 | Itih2                                                       | -2.0447679 | 2.06307087 | 1.45E-08 | 4.02E-07 |
| Fam219b                                                   | 1.33360275 | 4.72712323 | 6.72E-13 | 4.43E-11 | Igsf9b                                                      | -1.2827364 | 3.70336247 | 1.55E-08 | 4.26E-07 |
| Slc43a2                                                   | 1.02616467 | 5.32844579 | 7.00E-13 | 4.59E-11 | Brcc3                                                       | -1.0051722 | 4.38781274 | 1.66E-08 | 4.52E-07 |
| Glxr2                                                     | 1.09838653 | 5.16768094 | 1.38E-12 | 8.60E-11 | Pdk4                                                        | -2.0833921 | 2.25206301 | 1.67E-08 | 4.54E-07 |
| C920006O11                                                | 1.90020331 | 3.12556963 | 3.39E-12 | 2.01E-10 | Crygs                                                       | -1.4409746 | 3.37928331 | 1.95E-08 | 5.25E-07 |
| Xrcc2                                                     | 1.20377974 | 4.69068313 | 3.57E-12 | 2.11E-10 | Hsd17b10                                                    | -1.1085777 | 4.03260985 | 1.97E-08 | 5.28E-07 |
| Cercam                                                    | 1.28968443 | 4.32424278 | 3.92E-12 | 2.27E-10 | Bcat2                                                       | -1.274945  | 3.74719396 | 2.11E-08 | 5.60E-07 |
| Gm14322                                                   | 1.89997563 | 2.97034775 | 4.15E-12 | 2.39E-10 | Magea6                                                      | -1.6409526 | 3.31098182 | 2.92E-08 | 7.52E-07 |
| Creg2                                                     | 1.37854914 | 4.22171474 | 4.53E-12 | 2.60E-10 | Mid1                                                        | -1.6476633 | 2.38184905 | 3.30E-08 | 8.42E-07 |
| Fam206a                                                   | 1.04716756 | 5.38652838 | 4.70E-12 | 2.69E-10 | Magea10                                                     | -1.0014096 | 4.47186055 | 4.28E-08 | 1.07E-06 |
| Derl3                                                     | 1.36880765 | 4.15140729 | 4.77E-12 | 2.72E-10 | Gata4                                                       | -1.2643452 | 3.64326792 | 4.82E-08 | 1.18E-06 |
| Nrip3                                                     | 1.35384107 | 4.15397947 | 5.35E-12 | 3.03E-10 | Sfn                                                         | -1.1744538 | 3.88285735 | 4.84E-08 | 1.19E-06 |
| Clvs1                                                     | 2.30807337 | 1.98977518 | 8.38E-12 | 4.62E-10 | Rcor1                                                       | -1.4671101 | 4.09253028 | 6.11E-08 | 1.47E-06 |
| Zfp346                                                    | 1.02467785 | 5.76165441 | 1.20E-11 | 6.34E-10 | Cd68                                                        | -1.4558293 | 3.12664178 | 6.36E-08 | 1.52E-06 |
| Ccnb3                                                     | 1.06214687 | 5.74426115 | 1.36E-11 | 7.10E-10 | Crtam                                                       | -1.5830729 | 2.99662677 | 7.58E-08 | 1.77E-06 |
| Tmem40                                                    | 2.82166944 | 1.80730851 | 2.00E-11 | 1.03E-09 | Dnajc6                                                      | -1.0015194 | 4.28504018 | 9.61E-08 | 2.17E-06 |
| Orai3                                                     | 1.26942028 | 5.30131973 | 2.57E-11 | 1.30E-09 | Vwa1                                                        | -1.8254062 | 2.29348268 | 9.88E-08 | 2.22E-06 |
| 6820431F20f                                               | 1.59078125 | 3.49747762 | 2.59E-11 | 1.30E-09 | Sparc                                                       | -1.5239138 | 5.30022145 | 1.18E-07 | 2.60E-06 |
| Zfp953                                                    | 1.93830866 | 2.58287021 | 3.28E-11 | 1.62E-09 | Tmem160                                                     | -1.0053716 | 4.15680396 | 1.24E-07 | 2.70E-06 |
| Kndc1                                                     | 1.88966457 | 3.73919946 | 3.84E-11 | 1.85E-09 | Kctd15                                                      | -1.5324829 | 2.54331849 | 1.39E-07 | 2.99E-06 |
| Gm6710                                                    | 1.71302112 | 3.58497359 | 3.93E-11 | 1.87E-09 | Kcd300lb                                                    | -1.6881018 | 2.44068325 | 1.42E-07 | 3.05E-06 |
| Fstl4                                                     | 1.30213749 | 4.90048669 | 3.95E-11 | 1.87E-09 | Inhbb                                                       | -1.5912527 | 2.52425137 | 1.65E-07 | 3.51E-06 |
| Fam84b                                                    | 1.37488426 | 4.30436147 | 5.22E-11 | 2.41E-09 | Gabra2                                                      | -1.717626  | 2.52715811 | 1.86E-07 | 3.91E-06 |
| Gm14325                                                   | 1.85241599 | 3.34840605 | 5.46E-11 | 2.51E-09 | Endod1                                                      | -1.3045832 | 3.22184633 | 1.88E-07 | 3.94E-06 |
| Tomm7                                                     | 1.00875737 | 5.05765539 | 6.17E-11 | 2.79E-09 | Col6a5                                                      | -1.1193465 | 3.9391983  | 2.02E-07 | 4.21E-06 |
| Upk1b                                                     | 1.23701421 | 4.37943674 | 6.82E-11 | 3.07E-09 | Qprt                                                        | -1.0438967 | 3.91055841 | 2.09E-07 | 4.33E-06 |
| Myof                                                      | 1.03105098 | 5.88352687 | 7.05E-11 | 3.14E-09 | Cfi                                                         | -1.3874475 | 2.78681625 | 3.01E-07 | 6.00E-06 |
| 9330102E08f                                               | 1.48068788 | 3.67516932 | 9.76E-11 | 4.25E-09 | Tnfrsf11a                                                   | -1.727192  | 2.0459758  | 3.06E-07 | 6.08E-06 |
| Ano4                                                      | 1.60909944 | 3.60979722 | 1.03E-10 | 4.47E-09 | Efh1                                                        | -1.5788653 | 1.91298063 | 5.86E-07 | 1.09E-05 |
| Mtap7d3                                                   | 1.24712339 | 4.39403155 | 1.07E-10 | 4.60E-09 | Trim46                                                      | -1.165904  | 3.37787942 | 5.91E-07 | 1.09E-05 |
| Col22a1                                                   | 1.21696339 | 4.60946587 | 1.25E-10 | 5.29E-09 | Al607873                                                    | -1.8153532 | 2.18664628 | 6.54E-07 | 1.19E-05 |
| Nuggc                                                     | 2.4837937  | 2.30346646 | 1.25E-10 | 5.29E-09 | S100a3                                                      | -1.5441303 | 2.44827247 | 6.69E-07 | 1.21E-05 |
| Pamr1                                                     | 2.68320426 | 1.8698371  | 1.31E-10 | 5.52E-09 | Tmem80                                                      | -1.6456453 | 2.55263172 | 9.86E-07 | 1.69E-05 |
| Tmem53                                                    | 1.23699345 | 4.23047669 | 1.38E-10 | 5.78E-09 | Apoa1                                                       | -1.3662653 | 2.68347079 | 1.25E-06 | 2.09E-05 |
| Cdk5rap1                                                  | 1.1213579  | 5.32205911 | 1.85E-10 | 7.57E-09 | Sult1c1                                                     | -1.4820186 | 2.85866844 | 1.32E-06 | 2.20E-05 |
| A4galt                                                    | 1.98556253 | 2.99309293 | 2.13E-10 | 8.63E-09 | Pla2g1b                                                     | -1.3877995 | 2.4915224  | 1.36E-06 | 2.26E-05 |
| L1cam                                                     | 1.33536839 | 4.16411868 | 2.15E-10 | 8.68E-09 | S100a16                                                     | -1.1910892 | 3.63674225 | 1.51E-06 | 2.46E-05 |
| Cyp1b1                                                    | 1.99739027 | 2.79367086 | 2.40E-10 | 9.64E-09 | Adgrf1                                                      | -1.3637074 | 2.59825608 | 1.61E-06 | 2.60E-05 |
| Pnpla1                                                    | 1.02897284 | 4.94589138 | 3.55E-10 | 1.38E-08 | Dab2                                                        | -1.3037129 | 3.29951852 | 1.61E-06 | 2.60E-05 |
| Ky                                                        | 2.00941512 | 2.19853862 | 4.29E-10 | 1.62E-08 | Ror2                                                        | -1.0272813 | 5.00970516 | 1.75E-06 | 2.80E-05 |
| Glyctk                                                    | 1.10363883 | 5.08733473 | 5.67E-10 | 2.11E-08 | Gucy2g                                                      | -1.5347265 | 1.92438442 | 1.91E-06 | 3.02E-05 |
| Fam109b                                                   | 1.99253304 | 2.21039645 | 5.86E-10 | 2.17E-08 | Cpeb2                                                       | -1.1473529 | 4.51788904 | 2.07E-06 | 3.23E-05 |
| 2610005L07f                                               | 1.60237666 | 3.19923604 | 8.30E-10 | 2.99E-08 | S100a13                                                     | -1.5897566 | 2.12700216 | 2.08E-06 | 3.24E-05 |
| Ccdc28b                                                   | 2.14667032 | 1.93842692 | 9.14E-10 | 3.28E-08 | Gpc6                                                        | -1.3815505 | 2.8792447  | 2.25E-06 | 3.45E-05 |
| Slc5a4a                                                   | 1.83201696 | 2.55084175 | 1.22E-09 | 4.29E-08 | Klhl32                                                      | -1.0521806 | 3.66962097 | 2.52E-06 | 3.83E-05 |
| Rassf4                                                    | 1.15388852 | 4.19106707 | 1.37E-09 | 4.77E-08 | Sox9                                                        | -1.6314796 | 2.1404261  | 2.57E-06 | 3.90E-05 |
| Ap5b1                                                     | 2.03611048 | 2.47656953 | 1.41E-09 | 4.90E-08 | Abca8a                                                      | -1.1907716 | 3.68018193 | 2.78E-06 | 4.17E-05 |
| Gm14430                                                   | 1.8031456  | 2.43233282 | 1.85E-09 | 6.24E-08 | Cpe                                                         | -1.1856198 | 4.05089805 | 2.85E-06 | 4.24E-05 |
| Gm4724                                                    | 1.80314548 | 2.43233282 | 1.86E-09 | 6.25E-08 | Sh3bp5                                                      | -1.228519  | 3.24483558 | 3.29E-06 | 4.84E-05 |

**Supplementary Table 3. Significantly up- and down-regulated genes in *Asz1*<sup>-/-</sup> mice gonocytes compared with those of wild-type mice.**

| Upregulated Genes in <i>Asz1</i> <sup>-/-</sup> gonocytes |            |            |          |          | Downregulated Genes in <i>Asz1</i> <sup>-/-</sup> gonocytes |            |            |            |            |
|-----------------------------------------------------------|------------|------------|----------|----------|-------------------------------------------------------------|------------|------------|------------|------------|
| Gm14308                                                   | 1.80314545 | 2.43233282 | 1.86E-09 | 6.25E-08 | Nat14                                                       | -1.4870576 | 2.08773471 | 3.82E-06   | 5.53E-05   |
| Gm14434                                                   | 1.80314543 | 2.43233282 | 1.87E-09 | 6.25E-08 | Phf2                                                        | -1.1015653 | 3.48642894 | 4.05E-06   | 5.82E-05   |
| 0610010B08                                                | 1.80314535 | 2.43233282 | 1.87E-09 | 6.26E-08 | Tnnt2                                                       | -1.5856386 | 2.30261816 | 4.10E-06   | 5.88E-05   |
| 4932435O22                                                | 2.21437158 | 2.29472189 | 2.21E-09 | 7.30E-08 | 1110001J03F                                                 | -1.4080202 | 2.90008726 | 4.73E-06   | 6.68E-05   |
| B430306N03                                                | 1.10507347 | 4.40706206 | 2.55E-09 | 8.33E-08 | Zfp326                                                      | -1.2164425 | 3.24158064 | 4.75E-06   | 6.68E-05   |
| Mertk                                                     | 1.24601592 | 4.21303606 | 2.91E-09 | 9.40E-08 | 1700012D01                                                  | -1.4067696 | 2.26195339 | 4.95E-06   | 6.89E-05   |
| Cdh26                                                     | 2.22822803 | 2.28049176 | 5.05E-09 | 1.55E-07 | Bicd1                                                       | -1.5057237 | 2.17320979 | 4.96E-06   | 6.89E-05   |
| Pars2                                                     | 1.45021011 | 3.7655722  | 5.78E-09 | 1.75E-07 | Cadm4                                                       | -1.3044211 | 3.70915643 | 5.76E-06   | 7.94E-05   |
| Ttc26                                                     | 1.16806609 | 4.06075772 | 6.41E-09 | 1.92E-07 | Tnfaip2                                                     | -1.2210551 | 2.75215986 | 5.87E-06   | 8.06E-05   |
| 4930539E08                                                | 1.26143602 | 3.71407053 | 6.79E-09 | 2.02E-07 | Trim52                                                      | -1.0854764 | 3.54793243 | 5.96E-06   | 8.16E-05   |
| Gm14403                                                   | 1.78797195 | 2.61587307 | 7.24E-09 | 2.15E-07 | Vrk2                                                        | -1.0840792 | 3.34924034 | 6.63E-06   | 8.94E-05   |
| Srxn1                                                     | 1.46551236 | 3.53954859 | 7.63E-09 | 2.26E-07 | Ier5                                                        | -1.0524243 | 3.76720717 | 7.32E-06   | 9.74E-05   |
| Il10ra                                                    | 1.80721552 | 2.69741766 | 8.72E-09 | 2.53E-07 | Shc4                                                        | -1.0590605 | 4.08902587 | 7.62E-06   | 0.00010055 |
| Adra2a                                                    | 1.62195129 | 2.6773278  | 9.50E-09 | 2.73E-07 | RbmX                                                        | -1.2572166 | 2.80321124 | 8.44E-06   | 0.0001101  |
| Tigd3                                                     | 1.53806518 | 3.05481213 | 1.13E-08 | 3.22E-07 | 1700021F07                                                  | -1.1112939 | 3.19736056 | 8.93E-06   | 0.00011584 |
| Adgrv1                                                    | 1.12634531 | 4.79094583 | 1.14E-08 | 3.26E-07 | Syt7                                                        | -1.4668992 | 2.11843069 | 1.05E-05   | 0.00013278 |
| Ttc38                                                     | 1.31370125 | 3.86871937 | 1.26E-08 | 3.55E-07 | Sfxn1                                                       | -1.0759807 | 3.56932032 | 1.06E-05   | 0.00013444 |
| Slc7a4                                                    | 1.49940313 | 3.44204504 | 1.35E-08 | 3.76E-07 | St8sia3                                                     | -1.0337495 | 3.53289223 | 1.08E-05   | 0.0001368  |
| Sspn                                                      | 1.50062569 | 3.17029861 | 1.44E-08 | 3.99E-07 | Zp2                                                         | -1.6224175 | 2.11660378 | 1.12E-05   | 0.0001409  |
| Slc29a3                                                   | 1.23702661 | 3.71049018 | 1.86E-08 | 5.03E-07 | Thra                                                        | -1.2418124 | 2.64274736 | 1.15E-05   | 0.00014401 |
| Rspo2                                                     | 1.19980363 | 3.87471537 | 2.03E-08 | 5.43E-07 | Pfkfb3                                                      | -1.0286947 | 3.94009024 | 1.18E-05   | 0.00014728 |
| Cep128                                                    | 1.1497371  | 4.00517039 | 2.14E-08 | 5.66E-07 | BC021891                                                    | -1.2518764 | 2.57103832 | 1.24E-05   | 0.00015342 |
| H6pd                                                      | 1.95792891 | 2.31722742 | 2.22E-08 | 5.85E-07 | ProS1                                                       | -1.3707343 | 2.51806329 | 1.26E-05   | 0.00015529 |
| Excoc8                                                    | 1.02192829 | 4.35336316 | 2.60E-08 | 6.78E-07 | Slc27a5                                                     | -1.3196481 | 2.34575045 | 1.55E-05   | 0.00018536 |
| Ccdc28a                                                   | 1.17370159 | 3.82155967 | 2.63E-08 | 6.84E-07 | Ccser1                                                      | -1.1131008 | 3.18096481 | 1.72E-05   | 0.00020229 |
| Ube2u                                                     | 1.6181461  | 2.88973895 | 3.82E-08 | 9.61E-07 | 4931414P19                                                  | -1.3367427 | 2.22527436 | 1.82E-05   | 0.00021347 |
| Pkhd1                                                     | 1.90150379 | 2.35117784 | 3.84E-08 | 9.64E-07 | Vsx1                                                        | -1.097885  | 3.01812894 | 2.12E-05   | 0.000245   |
| Neil3                                                     | 1.37496064 | 3.65898404 | 4.03E-08 | 1.01E-06 | Anxa5                                                       | -1.0779641 | 3.35088114 | 2.16E-05   | 0.00024888 |
| Cbln2                                                     | 1.15914756 | 3.8416161  | 4.55E-08 | 1.13E-06 | Col6a1                                                      | -1.5338717 | 3.57456303 | 2.33E-05   | 0.00026603 |
| Eomes                                                     | 1.08723567 | 4.45311294 | 4.67E-08 | 1.15E-06 | Klf6                                                        | -1.0195962 | 3.68799096 | 2.69E-05   | 0.00029935 |
| Upp2                                                      | 1.59454224 | 2.83270973 | 5.46E-08 | 1.32E-06 | Morn2                                                       | -1.0629034 | 3.09126621 | 3.10E-05   | 0.00033999 |
| OTTMUSG0                                                  | 1.66266342 | 2.22927796 | 6.21E-08 | 1.49E-06 | Mtmr1                                                       | -1.177641  | 3.59847505 | 3.66E-05   | 0.00039154 |
| Fam19a4                                                   | 1.6181291  | 2.38907559 | 7.21E-08 | 1.70E-06 | Tnni1                                                       | -1.0955802 | 3.21505989 | 4.00E-05   | 0.00042152 |
| Zfp119a                                                   | 1.37146478 | 3.19422736 | 7.48E-08 | 1.75E-06 | Nap113                                                      | -1.2598939 | 2.26621973 | 4.04E-05   | 0.00042413 |
| Htra1                                                     | 1.2921555  | 3.98368897 | 8.25E-08 | 1.91E-06 | Cst12                                                       | -1.4254656 | 2.11639317 | 4.41E-05   | 0.00045808 |
| Cnr1                                                      | 1.03699931 | 4.26937225 | 9.15E-08 | 2.09E-06 | Snap25                                                      | -1.1601022 | 2.42137756 | 5.60E-05   | 0.00056046 |
| Sstr5                                                     | 1.1559345  | 4.65984999 | 9.54E-08 | 2.16E-06 | Cdhr2                                                       | -1.2878179 | 2.63608813 | 5.67E-05   | 0.00056595 |
| Kcnc2                                                     | 1.36317187 | 4.23329407 | 1.01E-07 | 2.25E-06 | Tbx4                                                        | -1.0612199 | 3.55312014 | 5.71E-05   | 0.00056844 |
| Gm14391                                                   | 1.56504229 | 2.62925729 | 1.03E-07 | 2.29E-06 | Adora1                                                      | -1.183875  | 2.89959607 | 6.10E-05   | 0.00060114 |
| Xkrx                                                      | 1.5034505  | 3.07696857 | 1.17E-07 | 2.57E-06 | Il10rb                                                      | -1.2039515 | 2.29521513 | 6.21E-05   | 0.00060926 |
| Zfp931                                                    | 1.60447594 | 2.39544803 | 1.65E-07 | 3.51E-06 | Col5a2                                                      | -1.5085109 | 2.34525058 | 7.76E-05   | 0.00074101 |
| BC026585                                                  | 1.19621655 | 4.00171394 | 2.38E-07 | 4.87E-06 | Ptprz1                                                      | -1.2940951 | 3.16857482 | 8.90E-05   | 0.00083555 |
| Cptp                                                      | 1.08452841 | 4.41919046 | 2.47E-07 | 5.00E-06 | Srcin1                                                      | -1.2048279 | 2.68943576 | 9.28E-05   | 0.00086444 |
| Gpa33                                                     | 1.44864019 | 2.6287114  | 2.49E-07 | 5.03E-06 | Vamp8                                                       | -1.0361361 | 2.99577626 | 9.32E-05   | 0.00086654 |
| Kdm8                                                      | 1.07463145 | 3.84845379 | 2.72E-07 | 5.46E-06 | Trps1                                                       | -1.1710963 | 2.17531905 | 9.34E-05   | 0.00086798 |
| Bik                                                       | 1.1177026  | 4.13138782 | 2.88E-07 | 5.78E-06 | Fam131b                                                     | -1.0316096 | 3.23154668 | 9.69E-05   | 0.00089292 |
| Deptor                                                    | 1.13633912 | 3.95254679 | 3.38E-07 | 6.62E-06 | Cd3e                                                        | -1.4740349 | 2.27308268 | 0.00011833 | 0.00105789 |
| Efcab6                                                    | 1.39942133 | 3.07896955 | 3.40E-07 | 6.65E-06 | 5031425E22                                                  | -1.2166287 | 2.18100381 | 0.00012411 | 0.0011025  |
| Cntn2                                                     | 1.75382556 | 2.37341464 | 4.12E-07 | 7.92E-06 | Slc7a10                                                     | -1.1625712 | 2.11576096 | 0.00012582 | 0.00111448 |
| Pld1                                                      | 1.3185046  | 3.17834616 | 4.63E-07 | 8.80E-06 | Sorbs2                                                      | -1.0706707 | 2.72212915 | 0.00013754 | 0.00120378 |
| Dffa                                                      | 1.04884396 | 4.1086591  | 4.74E-07 | 8.99E-06 | Gm13544                                                     | -1.2570301 | 2.50708022 | 0.00013844 | 0.00120995 |
| 2610524H06                                                | 1.57273036 | 3.32688809 | 5.29E-07 | 9.90E-06 | Cfap69                                                      | -1.1207236 | 2.94703235 | 0.00013918 | 0.00121558 |
| 2410012E07                                                | 1.45745772 | 2.66193951 | 5.71E-07 | 1.06E-05 | Dusp27                                                      | -1.1452649 | 2.34864267 | 0.00014349 | 0.00124795 |
| Slc10a4                                                   | 1.45217255 | 2.68315048 | 5.73E-07 | 1.07E-05 | Nfix                                                        | -1.268351  | 3.0248791  | 0.00015167 | 0.00130467 |
| Tagln                                                     | 1.20734555 | 3.31292553 | 6.23E-07 | 1.14E-05 | 2210010C04                                                  | -1.1623638 | 2.19869155 | 0.00015169 | 0.00130467 |
| Zfp820                                                    | 1.14681985 | 3.64308572 | 6.27E-07 | 1.15E-05 | Rpia                                                        | -1.1267196 | 2.29921097 | 0.00015613 | 0.00133551 |
| Rltpr                                                     | 1.00296755 | 3.98699415 | 7.05E-07 | 1.27E-05 | Notch4                                                      | -1.2189105 | 2.21704256 | 0.00018144 | 0.00151964 |
| St8sia5                                                   | 1.19182861 | 3.79108986 | 7.19E-07 | 1.29E-05 | Tph2                                                        | -1.1877752 | 2.37282024 | 0.00018314 | 0.0015313  |
| Spag6                                                     | 1.29534966 | 3.16835735 | 7.53E-07 | 1.34E-05 | Efcab2                                                      | -1.0936702 | 3.24549886 | 0.00018885 | 0.00156887 |
| Fras1                                                     | 1.16383159 | 3.34501623 | 7.84E-07 | 1.39E-05 | Cd274                                                       | -1.073539  | 2.94061647 | 0.00019789 | 0.00163437 |
| Mfsd4                                                     | 1.12816962 | 3.50558501 | 8.45E-07 | 1.48E-05 | Alox12b                                                     | -1.0762574 | 2.53665337 | 0.0002049  | 0.00168764 |
| Sec144                                                    | 2.08245198 | 2.07826549 | 8.68E-07 | 1.51E-05 | Clca1                                                       | -1.1185525 | 3.03276298 | 0.0002124  | 0.00173698 |
| Sppl2b                                                    | 1.11024687 | 4.79798197 | 9.13E-07 | 1.58E-05 | Fam187b                                                     | -1.1318783 | 2.48468055 | 0.00022178 | 0.00179716 |

**Supplementary Table 3. Significantly up- and down-regulated genes in *Asz1*<sup>-/-</sup> mice gonocytes compared with those of wild-type mice.**

| Upregulated Genes in <i>Asz1</i> <sup>-/-</sup> gonocytes |            |            |            |            | Downregulated Genes in <i>Asz1</i> <sup>-/-</sup> gonocytes |            |            |            |            |
|-----------------------------------------------------------|------------|------------|------------|------------|-------------------------------------------------------------|------------|------------|------------|------------|
| Pax9                                                      | 1.643349   | 3.36448099 | 9.66E-07   | 1.66E-05   | Zfp275                                                      | -1.0617811 | 2.63412941 | 0.00022341 | 0.00180803 |
| Exog                                                      | 1.04479896 | 4.10211445 | 1.06E-06   | 1.81E-05   | Serpinc1                                                    | -1.1079316 | 2.64143642 | 0.00023433 | 0.00188419 |
| Actc1                                                     | 1.78879802 | 2.2411266  | 1.08E-06   | 1.84E-05   | 4933402E13f                                                 | -1.204501  | 2.78521901 | 0.00024459 | 0.00195031 |
| Gm9112                                                    | 1.60487294 | 2.1451409  | 1.17E-06   | 1.97E-05   | Kitl                                                        | -1.3280851 | 2.6987501  | 0.00026127 | 0.00205572 |
| Map6d1                                                    | 1.23191644 | 3.18139319 | 1.19E-06   | 2.00E-05   | Plp1                                                        | -1.3106186 | 1.85958112 | 0.00027309 | 0.0021299  |
| Syn3                                                      | 1.10009536 | 3.93935881 | 1.23E-06   | 2.07E-05   | Syce1l                                                      | -1.0940325 | 2.36244597 | 0.00028063 | 0.00218047 |
| Ybey                                                      | 1.36650121 | 3.30798404 | 1.29E-06   | 2.15E-05   | Rin1                                                        | -1.1035399 | 2.26614264 | 0.00029348 | 0.00226291 |
| Fem1a                                                     | 1.41892452 | 3.15464073 | 1.30E-06   | 2.16E-05   | Fam114a1                                                    | -1.2870303 | 2.46705666 | 0.00029906 | 0.00229874 |
| Gm5091                                                    | 1.1037438  | 3.5407654  | 1.57E-06   | 2.55E-05   | Kazald1                                                     | -1.8304188 | 2.11755019 | 0.00030972 | 0.00236235 |
| Hs3st1                                                    | 1.1514783  | 3.40325316 | 1.70E-06   | 2.73E-05   | Nr5a1                                                       | -1.0288375 | 2.70534653 | 0.00032326 | 0.00244908 |
| Fam46b                                                    | 1.2201427  | 3.56835456 | 1.88E-06   | 2.97E-05   | Trappc6a                                                    | -1.0210933 | 2.4819844  | 0.00032986 | 0.00248702 |
| Kcnh1                                                     | 1.22694985 | 3.08820924 | 1.95E-06   | 3.07E-05   | Cd7                                                         | -1.1085912 | 2.20129955 | 0.00033368 | 0.00250694 |
| Fgf9                                                      | 1.15471267 | 3.41844133 | 1.99E-06   | 3.13E-05   | Al854517                                                    | -1.041527  | 2.45875316 | 0.00034715 | 0.00258958 |
| Klhl26                                                    | 1.63238336 | 2.99241706 | 2.20E-06   | 3.41E-05   | Rhox2d                                                      | -1.0836461 | 2.67689696 | 0.00036529 | 0.00270824 |
| D430020J02f                                               | 1.47275251 | 2.32448441 | 2.58E-06   | 3.91E-05   | Slc22a23                                                    | -1.0410207 | 2.42471691 | 0.0003813  | 0.00280526 |
| Cyp2u1                                                    | 1.03146141 | 3.75840968 | 2.59E-06   | 3.92E-05   | Zfpm2                                                       | -1.157357  | 2.98414833 | 0.00041088 | 0.00298417 |
| Lca5l                                                     | 1.31001026 | 2.8313633  | 2.83E-06   | 4.23E-05   | Pappa2                                                      | -1.0273348 | 3.37582928 | 0.00042973 | 0.00310295 |
| Nrn1l                                                     | 1.11368835 | 3.87810691 | 2.87E-06   | 4.26E-05   | Tecta                                                       | -1.0980309 | 2.11446464 | 0.00044923 | 0.00321871 |
| Cfb                                                       | 1.4966886  | 2.28531042 | 2.97E-06   | 4.39E-05   | Amhr2                                                       | -1.0811351 | 2.35839598 | 0.00055524 | 0.00382741 |
| Nos2                                                      | 1.47753506 | 2.35328307 | 3.00E-06   | 4.44E-05   | Igf2os                                                      | -1.189105  | 2.34333131 | 0.00066478 | 0.00442211 |
| Etoh1                                                     | 1.51170434 | 2.08470019 | 3.35E-06   | 4.91E-05   | Nedd9                                                       | -1.1402662 | 3.51436612 | 0.00073408 | 0.00480004 |
| Dnah7b                                                    | 1.15740127 | 3.74190626 | 3.45E-06   | 5.04E-05   | Col3a1                                                      | -1.166546  | 3.87349462 | 0.00082835 | 0.00529152 |
| Fitm2                                                     | 1.09704355 | 3.56513422 | 4.27E-06   | 6.08E-05   | Fosb                                                        | -1.7087219 | 2.59054699 | 0.00087286 | 0.00553048 |
| Zbtb20                                                    | 1.02395132 | 4.7370392  | 4.29E-06   | 6.10E-05   | Il20rb                                                      | -1.0128593 | 2.09817777 | 0.00089182 | 0.00562769 |
| Abcc10                                                    | 1.15945641 | 3.36116921 | 5.08E-06   | 7.06E-05   | Dsg2                                                        | -1.1886754 | 2.69010617 | 0.00094086 | 0.00587177 |
| Pde4c                                                     | 1.34869809 | 2.46358664 | 6.22E-06   | 8.48E-05   | Pomc                                                        | -1.0414269 | 1.94895131 | 0.00095325 | 0.00593372 |
| Zfp799                                                    | 1.04484906 | 3.88587991 | 6.28E-06   | 8.54E-05   | Pvrl2                                                       | -1.0260855 | 2.95773822 | 0.00095418 | 0.00593739 |
| Lhfp15                                                    | 1.50352199 | 2.07222208 | 6.80E-06   | 9.12E-05   | Mbtps2                                                      | -1.1349426 | 2.18660208 | 0.0015308  | 0.00877873 |
| Tecpr2                                                    | 1.11307007 | 3.99615531 | 7.20E-06   | 9.62E-05   | Akr1c12                                                     | -1.0303262 | 2.50632184 | 0.00156662 | 0.00893583 |
| Alg6                                                      | 1.32411576 | 2.63835416 | 7.94E-06   | 0.00010451 |                                                             |            |            |            |            |
| Itpr1p1                                                   | 1.00221375 | 3.65801742 | 8.07E-06   | 0.00010595 |                                                             |            |            |            |            |
| 9830147E19f                                               | 1.18163973 | 3.18954    | 8.79E-06   | 0.00011427 |                                                             |            |            |            |            |
| Slc18a3                                                   | 1.19603348 | 3.10929706 | 9.18E-06   | 0.00011868 |                                                             |            |            |            |            |
| Zdhhc25                                                   | 1.86261596 | 2.12649515 | 1.00E-05   | 0.00012761 |                                                             |            |            |            |            |
| Depdc1a                                                   | 1.20525526 | 3.64546985 | 1.02E-05   | 0.00012955 |                                                             |            |            |            |            |
| Smug1                                                     | 1.25786324 | 3.11589747 | 1.12E-05   | 0.0001409  |                                                             |            |            |            |            |
| Slc38a3                                                   | 1.21729573 | 3.12130559 | 1.33E-05   | 0.00016163 |                                                             |            |            |            |            |
| 9930014A18f                                               | 1.13423376 | 3.29782838 | 1.36E-05   | 0.00016498 |                                                             |            |            |            |            |
| Mas1                                                      | 1.32614862 | 2.40804844 | 1.36E-05   | 0.00016541 |                                                             |            |            |            |            |
| Htr3a                                                     | 1.32125493 | 2.69415633 | 1.45E-05   | 0.00017528 |                                                             |            |            |            |            |
| Efcab8                                                    | 1.64837621 | 2.59938369 | 1.73E-05   | 0.00020369 |                                                             |            |            |            |            |
| Tmem176b                                                  | 1.336546   | 3.25080445 | 2.42E-05   | 0.00027422 |                                                             |            |            |            |            |
| Rasl10b                                                   | 1.11164288 | 3.35429687 | 2.54E-05   | 0.00028482 |                                                             |            |            |            |            |
| Gm3604                                                    | 1.21724528 | 3.15595196 | 2.84E-05   | 0.00031467 |                                                             |            |            |            |            |
| Mfsd3                                                     | 1.16648039 | 2.97789471 | 3.10E-05   | 0.00033999 |                                                             |            |            |            |            |
| Dram1                                                     | 1.11128011 | 3.02668789 | 3.15E-05   | 0.00034376 |                                                             |            |            |            |            |
| Slfn9                                                     | 1.03632747 | 3.27160467 | 3.61E-05   | 0.00038778 |                                                             |            |            |            |            |
| Plip                                                      | 1.24821068 | 2.23589984 | 3.85E-05   | 0.00040783 |                                                             |            |            |            |            |
| Glimp                                                     | 1.30896788 | 3.29877512 | 3.90E-05   | 0.00041209 |                                                             |            |            |            |            |
| Ctdsp1                                                    | 1.00072956 | 3.3300604  | 4.32E-05   | 0.00045141 |                                                             |            |            |            |            |
| D030018L15                                                | 1.34411209 | 2.33521538 | 4.39E-05   | 0.00045754 |                                                             |            |            |            |            |
| Scg5                                                      | 1.22410146 | 2.7713525  | 4.46E-05   | 0.00046109 |                                                             |            |            |            |            |
| Hsd17b11                                                  | 1.22606797 | 2.21988321 | 4.76E-05   | 0.00048871 |                                                             |            |            |            |            |
| A530064D06                                                | 1.02120794 | 3.31627495 | 4.84E-05   | 0.00049562 |                                                             |            |            |            |            |
| Prrt3                                                     | 1.11613185 | 2.6643065  | 5.21E-05   | 0.00052754 |                                                             |            |            |            |            |
| AA414768                                                  | 1.31953954 | 2.15747887 | 5.53E-05   | 0.00055488 |                                                             |            |            |            |            |
| Ctag2                                                     | 1.24594499 | 2.52555269 | 6.12E-05   | 0.00060337 |                                                             |            |            |            |            |
| Afmid                                                     | 1.21594267 | 2.45969367 | 7.55E-05   | 0.00072353 |                                                             |            |            |            |            |
| Ccdc155                                                   | 1.20368395 | 2.1433358  | 8.02E-05   | 0.00076341 |                                                             |            |            |            |            |
| Rhbd1l                                                    | 1.22315786 | 1.99639765 | 8.04E-05   | 0.00076393 |                                                             |            |            |            |            |
| Cdh20                                                     | 1.00482895 | 2.98698141 | 9.45E-05   | 0.00087547 |                                                             |            |            |            |            |
| Gm5113                                                    | 1.02704826 | 3.16757164 | 0.00010269 | 0.00094037 |                                                             |            |            |            |            |
| Pla2g2d                                                   | 1.16595426 | 2.53962099 | 0.00011063 | 0.00099981 |                                                             |            |            |            |            |

**Supplementary Table 3. Significantly up- and down-regulated genes in *Asz1*<sup>-/-</sup> mice gonocytes compared with those of wild-type mice.**

|            | Upregulated Genes in <i>Asz1</i> <sup>-/-</sup> gonocytes |            |            |            | Downregulated Genes in <i>Asz1</i> <sup>-/-</sup> gonocytes |  |  |  |
|------------|-----------------------------------------------------------|------------|------------|------------|-------------------------------------------------------------|--|--|--|
| Pts        | 1.04417683                                                | 3.54379918 | 0.00011736 | 0.00105304 |                                                             |  |  |  |
| Sfi1       | 1.45291534                                                | 2.68719344 | 0.00013176 | 0.0011589  |                                                             |  |  |  |
| Gcnt1      | 1.02894831                                                | 3.63222514 | 0.00015205 | 0.00130692 |                                                             |  |  |  |
| Btnl9      | 1.07534017                                                | 2.44474206 | 0.00018623 | 0.00155144 |                                                             |  |  |  |
| Tspy13     | 1.01508708                                                | 2.68994318 | 0.00018895 | 0.00156887 |                                                             |  |  |  |
| Ankrd42    | 1.00614367                                                | 3.04436994 | 0.00019371 | 0.00160302 |                                                             |  |  |  |
| Gdap1      | 1.09981931                                                | 2.58851885 | 0.00022655 | 0.00183107 |                                                             |  |  |  |
| Pomgnt2    | 1.1099916                                                 | 2.48058521 | 0.0002572  | 0.00202748 |                                                             |  |  |  |
| 1700011M02 | 1.08653379                                                | 2.41364698 | 0.00026246 | 0.00206116 |                                                             |  |  |  |
| Vipr1      | 1.02516757                                                | 3.28707543 | 0.00026875 | 0.00210234 |                                                             |  |  |  |
| Gm5878     | 1.21645707                                                | 2.56553106 | 0.00027265 | 0.00212773 |                                                             |  |  |  |
| Acer2      | 1.07982494                                                | 2.40997096 | 0.00029141 | 0.00224884 |                                                             |  |  |  |
| Gm13238    | 1.05064983                                                | 2.62674161 | 0.00030474 | 0.00233289 |                                                             |  |  |  |
| Vrtn       | 1.19256663                                                | 1.98309242 | 0.00031179 | 0.00237379 |                                                             |  |  |  |
| Pik3r5     | 1.17183347                                                | 3.54136416 | 0.00032551 | 0.00246167 |                                                             |  |  |  |
| Them6      | 1.02949771                                                | 2.58546603 | 0.00034148 | 0.00255454 |                                                             |  |  |  |
| Azin2      | 1.05220094                                                | 2.67202935 | 0.00041312 | 0.0029969  |                                                             |  |  |  |
| Tmem202    | 1.06865893                                                | 2.09922517 | 0.00043352 | 0.00312668 |                                                             |  |  |  |
| Car4       | 1.14607823                                                | 2.23975147 | 0.00043747 | 0.00314971 |                                                             |  |  |  |
| Slc16a9    | 1.00938917                                                | 2.84679917 | 0.00052259 | 0.00363655 |                                                             |  |  |  |
| Ulbp1      | 1.03260766                                                | 2.26267478 | 0.0005761  | 0.00394503 |                                                             |  |  |  |
| Wdfy2      | 1.08717979                                                | 2.87008547 | 0.00060486 | 0.00409917 |                                                             |  |  |  |
| Cnga3      | 1.13936383                                                | 2.96351365 | 0.00098675 | 0.00609708 |                                                             |  |  |  |
| Zfp345     | 1.01168075                                                | 2.48300926 | 0.00145843 | 0.00843563 |                                                             |  |  |  |

**Supplementary Table 4. Genomic locations of aberrant chimeric transcript variant 5' exons.**

| <b>Transcripts</b>   | <b>Positions of 5' exons of aberrant chimeric transcript variants</b> |           |           | <b>strand</b> |
|----------------------|-----------------------------------------------------------------------|-----------|-----------|---------------|
| <i>Gm9733</i>        | chr3                                                                  | 15334826  | 15335106  | -             |
| <i>Fancd2</i>        | chr6                                                                  | 113543997 | 113544539 | +             |
| <i>Cdh12</i>         | chr15                                                                 | 21565466  | 21565647  | +             |
| <i>Rsrcl</i>         | chr3                                                                  | 67029941  | 67030201  | +             |
| <i>4930558C23Rik</i> | chr3                                                                  | 95406554  | 95406818  | -             |
| <i>Hibch</i>         | chr1                                                                  | 52893921  | 52894101  | +             |
| <i>Inadl</i>         | chr4                                                                  | 98454560  | 98454822  | +             |
| <i>Grid1</i>         | chr14                                                                 | 35514545  | 35514841  | +             |
| <i>Apoh</i>          | chr11                                                                 | 108404308 | 108404732 | +             |
| <i>Eps8l1</i>        | chr7                                                                  | 4460644   | 4461024   | +             |
| <i>Ccdc117</i>       | chr11                                                                 | 5535356   | 5535491   | -             |
| <i>Spag16</i>        | chr1                                                                  | 69831740  | 69831850  | +             |
| <i>Adtrp</i>         | chr13                                                                 | 41817115  | 41818458  | -             |
| <i>l7Rn6</i>         | chr7                                                                  | 89943847  | 89944037  | -             |
| <i>Zfp72</i>         | chr13                                                                 | 74384065  | 74384330  | -             |
| <i>Mup3</i>          | chr4                                                                  | 62101373  | 62101531  | -             |
| <i>Gabrr1</i>        | chr4                                                                  | 33123718  | 33124099  | +             |
| <i>Gm16897</i>       | chr1                                                                  | 194970593 | 194970843 | -             |
| <i>Ano4</i>          | chr10                                                                 | 89171040  | 89171506  | -             |
| <i>Sec11a</i>        | chr7                                                                  | 80935296  | 80935446  | -             |
| <i>Nrros</i>         | chr16                                                                 | 32148059  | 32148324  | -             |
| <i>Abcb11</i>        | chr2                                                                  | 69268366  | 69268487  | -             |
| <i>Sult2a5</i>       | chr7                                                                  | 13597405  | 13597722  | +             |
| <i>Tomm7</i>         | chr5                                                                  | 23847706  | 23848012  | -             |
| <i>Fam135a</i>       | chr1                                                                  | 24068223  | 24068622  | -             |
| <i>Cyp20a1</i>       | chr1                                                                  | 60375742  | 60375925  | +             |
| <i>Raver2</i>        | chr4                                                                  | 101128894 | 101129392 | +             |
| <i>Esco2</i>         | chr14                                                                 | 65833536  | 65833651  | -             |
| <i>Rblcc1</i>        | chr1                                                                  | 6223598   | 6223745   | +             |
| <i>Glx2</i>          | chr1                                                                  | 143739814 | 143739979 | +             |
| <i>Usp44</i>         | chr10                                                                 | 93833252  | 93833891  | +             |
| <i>Aig1</i>          | chr10                                                                 | 13692246  | 13692427  | -             |

**Supplementary Table 5. Retrotransposons located within 1 kb upstream of the aberrant chimeric transcript variants.**

| <b>Aberrant chimeric transcript variants</b> | <b>Retrotransposons within 1kb upstream of the transcripts</b> |
|----------------------------------------------|----------------------------------------------------------------|
| <i>Gm9733</i>                                | IAPLTR2_Mm,L1_Mus3,L1_Mus3                                     |
| <i>Rsrc1</i>                                 | IAPez-int,IAPLTR1_Mm                                           |
| <i>Gm16897</i>                               | IAP1-MM_LTR,PB1D11,MIRb                                        |
| <i>4930558C23Rik</i>                         | IAPLTR2b,MuLV-int                                              |
| <i>Aig1</i>                                  | Lx7,L1_Rod,RLTR10A,RMER19B                                     |
| <i>Gabbr1</i>                                | Lx9,Lx9,ORR1B1,RLTR10C,RLTR10C                                 |
| <i>Mup3</i>                                  | IAPLTR2b,B3A                                                   |
| <i>Inadl</i>                                 | IAPLTR1_Mm                                                     |
| <i>Raver2</i>                                | IAPez-int,IAPLTR1_Mm                                           |
| <i>Rb1cc1</i>                                | PB1,B1_Mus2,B1_Mur2                                            |
| <i>Tomm7</i>                                 | LTRIS2,RLTR10A,B1_Mus2                                         |
| <i>Fancd2</i>                                | IAPLTR2a,B3,B1_Mur3                                            |
| <i>Eps81</i>                                 | IAPez-int,IAPLTR1_Mm                                           |
| <i>Sult2a5</i>                               | L1Md_A                                                         |
| <i>Sec11a</i>                                | IAPLTR1a_Mm,MTE2a,ID_B1,B1_Mus1,B3                             |
| <i>I7Rn6</i>                                 | IAPLTR2a,RLTR15,RLTR15,MYSERV16_I-int                          |
| <i>Ano4</i>                                  | IAPLTR2a                                                       |
| <i>Usp44</i>                                 | B3                                                             |
| <i>Ccdc117</i>                               | IAPLTR2_Mm,B2_Mm2,B3                                           |
| <i>Hibch</i>                                 | L1Md_A                                                         |
| <i>Cyp20a1</i>                               | RSINE1,IAPLTR2b,B2_Mm2                                         |
| <i>Apoh</i>                                  | IAPez-int,IAPLTR1_Mm                                           |
| <i>Spag16</i>                                | MTC,MTD,MTD,IAPLTR2b,B1_Mur4                                   |
| <i>Adtrp</i>                                 | IAPLTR2a,MIR,B4A                                               |
| <i>Zfp72</i>                                 | Lx7,Lx7,IAPLTR2b,RMER6BA                                       |
| <i>Grid1</i>                                 | ORR1A4,IAPLTR2_Mm                                              |
| <i>Esco2</i>                                 | B3A,MIRb                                                       |
| <i>Cdh12</i>                                 | ORR1B1-int,ORR1B1,IAPLTR2b                                     |
| <i>Nros</i>                                  | IAPLTR1_Mm,IAPez-int                                           |
| <i>Glrx2</i>                                 | B1_Mm                                                          |
| <i>Fam135a</i>                               | Lx8,IAPLTR2_Mm,B1F2                                            |
| <i>Abcb11</i>                                | IAPLTR2b                                                       |
